# Supplementary material for: Detection of a Conspecific Mycovirus in Two Closely Related Native and Introduced Fungal Hosts and Evidence for Interspecific Virus Transmission
Source: PubMed Central journal article supplement (PMC6266060; doi:10.3390/v10110628), 2018-11-13
Supplement: viruses-10-00628-s001.pdf [file viruses-10-00628-s001.pdf]

**Supporting Materials****Manuscript title**

Detection of a conspecific mycovirus in two closely related native and introduced fungal hosts and evidence for interspecific virus transmission

**Authors**

Corine N. Schoebel, Simone Prospero, Andrin Gross, Daniel Rigling  
Swiss Federal Institute for Forest, Snow and Landscape Research, WSL, Zuercherstrasse 111,  
8903 Birmensdorf, Switzerland.

**Table S1:** Details on the isolates in the study with sample locations, years and GenBank accession numbers, etc. \*In case sequences were previously submitted to GenBank, the respective reference is given. – indicates that no sequence was submitted.

| ID     | Year | Species                        | Canton      | Coordinates N | Coordinates E | Region                            | GenBank Accession numbers |               |     |     | Reference |
|--------|------|--------------------------------|-------------|---------------|---------------|-----------------------------------|---------------------------|---------------|-----|-----|-----------|
|        |      |                                |             |               |               |                                   | RdRP 495 *                | RdRP full ORF | ITS | SSR |           |
| AIG01L | 2013 | <i>Hymenoscyphus fraxineus</i> | Vaud (VD)   | 46.32589      | 6.93349       | South-Western Switzerland (SW-CH) | [13]                      |               | no  | x   | [13]      |
| AIG01P | 2013 | <i>Hymenoscyphus fraxineus</i> | Vaud (VD)   | 46.32589      | 6.93349       | South-Western Switzerland (SW-CH) | -                         | MK079873      | no  | x   | [13]      |
| AIG02L | 2013 | <i>Hymenoscyphus fraxineus</i> | Vaud (VD)   | 46.32589      | 6.93349       | South-Western Switzerland (SW-CH) | [13]                      |               | no  | x   | [13]      |
| AIG04L | 2013 | <i>Hymenoscyphus fraxineus</i> | Vaud (VD)   | 46.32589      | 6.93349       | South-Western Switzerland (SW-CH) | [13]                      |               | no  | x   | [13]      |
| AIG06P | 2013 | <i>Hymenoscyphus fraxineus</i> | Vaud (VD)   | 46.32589      | 6.93349       | South-Western Switzerland (SW-CH) | [13]                      |               | no  | x   | [13]      |
| AIG09P | 2013 | <i>Hymenoscyphus fraxineus</i> | Vaud (VD)   | 46.32589      | 6.93349       | South-Western Switzerland (SW-CH) | [13]                      |               | no  | x   | [13]      |
| AIG11P | 2013 | <i>Hymenoscyphus fraxineus</i> | Vaud (VD)   | 46.32589      | 6.93349       | South-Western Switzerland (SW-CH) | [13]                      |               | no  | x   | [13]      |
| AIG16P | 2013 | <i>Hymenoscyphus fraxineus</i> | Vaud (VD)   | 46.32589      | 6.93349       | South-Western Switzerland (SW-CH) | [13]                      |               | no  | x   | [13]      |
| AIG20L | 2013 | <i>Hymenoscyphus fraxineus</i> | Vaud (VD)   | 46.32589      | 6.93349       | South-Western Switzerland (SW-CH) | [13]                      |               | no  | x   | [13]      |
| AIG22P | 2013 | <i>Hymenoscyphus fraxineus</i> | Vaud (VD)   | 46.32589      | 6.93349       | South-Western Switzerland (SW-CH) | [13]                      |               | no  | x   | [13]      |
| AIG23L | 2013 | <i>Hymenoscyphus fraxineus</i> | Vaud (VD)   | 46.32589      | 6.93349       | South-Western Switzerland (SW-CH) | [13]                      |               | no  | x   | [13]      |
| AIG23P | 2013 | <i>Hymenoscyphus fraxineus</i> | Vaud (VD)   | 46.32589      | 6.93349       | South-Western Switzerland (SW-CH) | [13]                      |               | no  | x   | [13]      |
| AIG29P | 2013 | <i>Hymenoscyphus fraxineus</i> | Vaud (VD)   | 46.32589      | 6.93349       | South-Western Switzerland (SW-CH) | -                         | MK079874      | no  | x   | [13]      |
| AIG35L | 2013 | <i>Hymenoscyphus fraxineus</i> | Vaud (VD)   | 46.32589      | 6.93349       | South-Western Switzerland (SW-CH) | [13]                      |               | no  | x   | [13]      |
| AIG35P | 2013 | <i>Hymenoscyphus fraxineus</i> | Vaud (VD)   | 46.32589      | 6.93349       | South-Western Switzerland (SW-CH) | -                         | MK079876      | no  | x   | [13]      |
| AIG41L | 2013 | <i>Hymenoscyphus fraxineus</i> | Vaud (VD)   | 46.32589      | 6.93349       | South-Western Switzerland (SW-CH) | [13]                      |               | no  | x   | [13]      |
| AIG43L | 2013 | <i>Hymenoscyphus fraxineus</i> | Vaud (VD)   | 46.32589      | 6.93349       | South-Western Switzerland (SW-CH) | -                         | MK079875      | no  | x   | [13]      |
| AIG46P | 2013 | <i>Hymenoscyphus fraxineus</i> | Vaud (VD)   | 46.32589      | 6.93349       | South-Western Switzerland (SW-CH) | [13]                      |               | no  | x   | [13]      |
| AIG47L | 2013 | <i>Hymenoscyphus fraxineus</i> | Vaud (VD)   | 46.53104      | 6.36983       | South-Western Switzerland (SW-CH) | -                         | In revision   | no  | x   | [13]      |
| AIG60L | 2013 | <i>Hymenoscyphus fraxineus</i> | Vaud (VD)   | 46.32589      | 6.93349       | South-Western Switzerland (SW-CH) | [13]                      |               | no  | x   | [13]      |
| BIE05L | 2013 | <i>Hymenoscyphus fraxineus</i> | Vaud (VD)   | 46.53104      | 6.36983       | South-Western Switzerland (SW-CH) | [13]                      |               | no  | x   | [13]      |
| BIE14L | 2013 | <i>Hymenoscyphus fraxineus</i> | Vaud (VD)   | 46.53104      | 6.36983       | South-Western Switzerland (SW-CH) | -                         | MK079877      | no  | x   | [13]      |
| BIE16L | 2013 | <i>Hymenoscyphus fraxineus</i> | Vaud (VD)   | 46.53104      | 6.36983       | South-Western Switzerland (SW-CH) | [13]                      |               | no  | x   | [13]      |
| BIE17P | 2013 | <i>Hymenoscyphus fraxineus</i> | Vaud (VD)   | 46.53104      | 6.36983       | South-Western Switzerland (SW-CH) | [13]                      |               | no  | x   | [13]      |
| BIE21P | 2013 | <i>Hymenoscyphus fraxineus</i> | Vaud (VD)   | 46.32589      | 6.93349       | South-Western Switzerland (SW-CH) | -                         | MK079878      | no  | x   | [13]      |
| BIE22L | 2013 | <i>Hymenoscyphus fraxineus</i> | Vaud (VD)   | 46.53104      | 6.36983       | South-Western Switzerland (SW-CH) | -                         | MK079879      | no  | x   | [13]      |
| BIE24L | 2013 | <i>Hymenoscyphus fraxineus</i> | Vaud (VD)   | 46.53104      | 6.36983       | South-Western Switzerland (SW-CH) | -                         | MK079880      | no  | x   | [13]      |
| BIE25L | 2013 | <i>Hymenoscyphus fraxineus</i> | Vaud (VD)   | 46.53104      | 6.36983       | South-Western Switzerland (SW-CH) | -                         | MK079881      | no  | x   | [13]      |
| BIE26P | 2013 | <i>Hymenoscyphus fraxineus</i> | Vaud (VD)   | 46.53104      | 6.36983       | South-Western Switzerland (SW-CH) | [13]                      |               | no  | x   | [13]      |
| BIE31P | 2013 | <i>Hymenoscyphus fraxineus</i> | Vaud (VD)   | 46.53104      | 6.36983       | South-Western Switzerland (SW-CH) | [13]                      |               | no  | x   | [13]      |
| BIE32P | 2013 | <i>Hymenoscyphus fraxineus</i> | Vaud (VD)   | 46.53104      | 6.36983       | South-Western Switzerland (SW-CH) | -                         | MK079882      | no  | x   | [13]      |
| BIE39L | 2013 | <i>Hymenoscyphus fraxineus</i> | Vaud (VD)   | 46.53104      | 6.36983       | South-Western Switzerland (SW-CH) | [13]                      |               | no  | x   | [13]      |
| BIE43P | 2013 | <i>Hymenoscyphus fraxineus</i> | Vaud (VD)   | 46.53104      | 6.36983       | South-Western Switzerland (SW-CH) | [13]                      |               | no  | x   | [13]      |
| BIE45P | 2013 | <i>Hymenoscyphus fraxineus</i> | Vaud (VD)   | 46.53104      | 6.36983       | South-Western Switzerland (SW-CH) | [13]                      |               | no  | x   | [13]      |
| BIE48L | 2013 | <i>Hymenoscyphus fraxineus</i> | Vaud (VD)   | 46.53104      | 6.36983       | South-Western Switzerland (SW-CH) | [13]                      |               | no  | x   | [13]      |
| BIE49P | 2013 | <i>Hymenoscyphus fraxineus</i> | Vaud (VD)   | 46.53104      | 6.36983       | South-Western Switzerland (SW-CH) | [13]                      |               | no  | x   | [13]      |
| BIE53L | 2013 | <i>Hymenoscyphus fraxineus</i> | Vaud (VD)   | 46.53104      | 6.36983       | South-Western Switzerland (SW-CH) | [13]                      |               | no  | x   | [13]      |
| BIE54P | 2013 | <i>Hymenoscyphus fraxineus</i> | Vaud (VD)   | 46.53104      | 6.36983       | South-Western Switzerland (SW-CH) | [13]                      |               | no  | x   | [13]      |
| BIE57L | 2013 | <i>Hymenoscyphus fraxineus</i> | Vaud (VD)   | 46.53104      | 6.36983       | South-Western Switzerland (SW-CH) | [13]                      |               | no  | x   | [13]      |
| BIE59P | 2013 | <i>Hymenoscyphus fraxineus</i> | Vaud (VD)   | 46.53104      | 6.36983       | South-Western Switzerland (SW-CH) | [13]                      |               | no  | x   | [13]      |
| KUE02L | 2013 | <i>Hymenoscyphus fraxineus</i> | Schwyz (SZ) | 47.07013      | 8.458         | Northern Switzerland (N-CH)       | [13]                      |               | no  | x   | [13]      |
| KUE05L | 2013 | <i>Hymenoscyphus fraxineus</i> | Schwyz (SZ) | 47.07013      | 8.458         | Northern Switzerland (N-CH)       | -                         | MK079872      | no  | x   | [13]      |
| KUE06L | 2013 | <i>Hymenoscyphus fraxineus</i> | Schwyz (SZ) | 47.07013      | 8.458         | Northern Switzerland (N-CH)       | [13]                      |               | no  | x   | [13]      |
| KUE06P | 2013 | <i>Hymenoscyphus fraxineus</i> | Schwyz (SZ) | 47.07013      | 8.458         | Northern Switzerland (N-CH)       | [13]                      |               | no  | x   | [13]      |
| KUE10L | 2013 | <i>Hymenoscyphus fraxineus</i> | Schwyz (SZ) | 47.07013      | 8.458         | Northern Switzerland (N-CH)       | -                         | MK079869      | no  | x   | [13]      |
| KUE11L | 2013 | <i>Hymenoscyphus fraxineus</i> | Schwyz (SZ) | 47.07013      | 8.458         | Northern Switzerland (N-CH)       | [13]                      |               | no  | x   | [13]      |
| KUE11P | 2013 | <i>Hymenoscyphus fraxineus</i> | Schwyz (SZ) | 47.07013      | 8.458         | Northern Switzerland (N-CH)       | [13]                      |               | no  | x   | [13]      |
| KUE24L | 2013 | <i>Hymenoscyphus fraxineus</i> | Schwyz (SZ) | 47.07013      | 8.458         | Northern Switzerland (N-CH)       | -                         | MK079870      | no  | x   | [13]      |
| KUE13L | 2013 | <i>Hymenoscyphus fraxineus</i> | Schwyz (SZ) | 47.07013      | 8.458         | Northern Switzerland (N-CH)       | [13]                      |               | no  | x   | [13]      |
| KUE15L | 2013 | <i>Hymenoscyphus fraxineus</i> | Schwyz (SZ) | 47.07013      | 8.458         | Northern Switzerland (N-CH)       | [13]                      |               | no  | x   | [13]      |
| KUE24P | 2013 | <i>Hymenoscyphus fraxineus</i> | Schwyz (SZ) | 47.07013      | 8.458         | Northern Switzerland (N-CH)       | [13]                      |               | no  | x   | [13]      |
| KUE36L | 2013 | <i>Hymenoscyphus fraxineus</i> | Schwyz (SZ) | 47.07013      | 8.458         | Northern Switzerland (N-CH)       | [13]                      |               | no  | x   | [13]      |
| KUE37P | 2013 | <i>Hymenoscyphus fraxineus</i> | Schwyz (SZ) | 47.07013      | 8.458         | Northern Switzerland (N-CH)       | -                         | MK079871      | no  | x   | [13]      |
| KUE39P | 2013 | <i>Hymenoscyphus fraxineus</i> | Schwyz (SZ) | 47.07013      | 8.458         | Northern Switzerland (N-CH)       | [13]                      |               | no  | x   | [13]      |
| KUE42P | 2013 | <i>Hymenoscyphus fraxineus</i> | Schwyz (SZ) | 47.07013      | 8.458         | Northern Switzerland (N-CH)       | [13]                      |               | no  | x   | [13]      |





|        |      |                                |             |           |          |                                   |          |          |          |                  |
|--------|------|--------------------------------|-------------|-----------|----------|-----------------------------------|----------|----------|----------|------------------|
| WAS8   | 2014 | <i>Hymenoscyphus fraxineus</i> | Uri (UR)    | 46.70185  | 8.59726  | Northern Switzerland (N-CH)       | MK079780 |          |          | this study       |
| WAS9   | 2014 | <i>Hymenoscyphus fraxineus</i> | Uri (UR)    | 46.70185  | 8.59726  | Northern Switzerland (N-CH)       | -        |          |          | this study       |
| SOA10c | 2016 | <i>Hymenoscyphus fraxineus</i> | Grison (GR) | 46.35     | 9.216667 | Southern Switzerland (S-CH)       | MK079714 | -        |          | this study       |
| SOA2a  | 2016 | <i>Hymenoscyphus fraxineus</i> | Grison (GR) | 46.35     | 9.216667 | Southern Switzerland (S-CH)       | MK079715 | -        |          | this study       |
| SOA8a  | 2016 | <i>Hymenoscyphus fraxineus</i> | Grison (GR) | 46.35     | 9.216667 | Southern Switzerland (S-CH)       | MK079716 | -        |          | this study       |
| SOA9b  | 2016 | <i>Hymenoscyphus fraxineus</i> | Grison (GR) | 46.35     | 9.216667 | Southern Switzerland (S-CH)       | MK079717 | -        |          | this study       |
| COR10a | 2016 | <i>Hymenoscyphus fraxineus</i> | Ticino (TI) | 46.44526  | 8.93785  | Southern Switzerland (S-CH)       | MK079781 | MF765422 |          | this study       |
| COR1a  | 2016 | <i>Hymenoscyphus fraxineus</i> | Ticino (TI) | 46.44526  | 8.93785  | Southern Switzerland (S-CH)       | MK079782 | MF765423 |          | this study       |
| COR3a  | 2016 | <i>Hymenoscyphus fraxineus</i> | Ticino (TI) | 46.44526  | 8.93785  | Southern Switzerland (S-CH)       | -        | MF765425 |          | this study       |
| COR5a  | 2016 | <i>Hymenoscyphus fraxineus</i> | Ticino (TI) | 46.44526  | 8.93785  | Southern Switzerland (S-CH)       | MK079783 | MF765427 |          | this study       |
| COR6a  | 2016 | <i>Hymenoscyphus fraxineus</i> | Ticino (TI) | 46.44526  | 8.93785  | Southern Switzerland (S-CH)       | -        | MF765428 |          | this study       |
| COR7b  | 2016 | <i>Hymenoscyphus fraxineus</i> | Ticino (TI) | 46.44526  | 8.93785  | Southern Switzerland (S-CH)       | MK079784 | MF765429 |          | this study       |
| COR8a  | 2016 | <i>Hymenoscyphus fraxineus</i> | Ticino (TI) | 46.44526  | 8.93785  | Southern Switzerland (S-CH)       | MK079785 | MF765430 |          | this study       |
| COR9b  | 2016 | <i>Hymenoscyphus fraxineus</i> | Ticino (TI) | 46.44526  | 8.93785  | Southern Switzerland (S-CH)       | MK079786 | MF765431 |          | this study       |
| BRI10a | 2016 | <i>Hymenoscyphus fraxineus</i> | Ticino (TI) | 46.298265 | 8.790192 | Southern Switzerland (S-CH)       | MK079787 |          |          | this study       |
| BRI3a  | 2016 | <i>Hymenoscyphus fraxineus</i> | Ticino (TI) | 46.298265 | 8.790192 | Southern Switzerland (S-CH)       | MK079788 |          |          | this study       |
| BRI4a  | 2016 | <i>Hymenoscyphus fraxineus</i> | Ticino (TI) | 46.298265 | 8.790192 | Southern Switzerland (S-CH)       | MK079789 |          |          | this study       |
| BRI5a  | 2016 | <i>Hymenoscyphus fraxineus</i> | Ticino (TI) | 46.298265 | 8.790192 | Southern Switzerland (S-CH)       | MK079790 |          |          | this study       |
| BRI6a  | 2016 | <i>Hymenoscyphus fraxineus</i> | Ticino (TI) | 46.298265 | 8.790192 | Southern Switzerland (S-CH)       | MK079791 |          |          | this study       |
| BRI8a  | 2016 | <i>Hymenoscyphus fraxineus</i> | Ticino (TI) | 46.298265 | 8.790192 | Southern Switzerland (S-CH)       | MK079792 |          |          | this study       |
| BRI9a  | 2016 | <i>Hymenoscyphus fraxineus</i> | Ticino (TI) | 46.298265 | 8.790192 | Southern Switzerland (S-CH)       | MK079793 |          |          | this study       |
| AMB10a | 2016 | <i>Hymenoscyphus fraxineus</i> | Ticino (TI) | 46.500727 | 8.720870 | Southern Switzerland (S-CH)       | MK079794 |          |          | this study       |
| AMB11a | 2016 | <i>Hymenoscyphus fraxineus</i> | Ticino (TI) | 46.500727 | 8.720870 | Southern Switzerland (S-CH)       | MK079795 |          |          | this study       |
| AMB13a | 2016 | <i>Hymenoscyphus fraxineus</i> | Ticino (TI) | 46.500727 | 8.720870 | Southern Switzerland (S-CH)       | MK079796 |          |          | this study       |
| AMB2b  | 2016 | <i>Hymenoscyphus fraxineus</i> | Ticino (TI) | 46.500727 | 8.720870 | Southern Switzerland (S-CH)       | MK079797 |          |          | this study       |
| AMB4b  | 2016 | <i>Hymenoscyphus fraxineus</i> | Ticino (TI) | 46.500727 | 8.720870 | Southern Switzerland (S-CH)       | MK079798 |          |          | this study       |
| AMB7b  | 2016 | <i>Hymenoscyphus fraxineus</i> | Ticino (TI) | 46.500727 | 8.720870 | Southern Switzerland (S-CH)       | MK079799 |          |          | this study       |
| AMB8c  | 2016 | <i>Hymenoscyphus fraxineus</i> | Ticino (TI) | 46.500727 | 8.720870 | Southern Switzerland (S-CH)       | MK079800 |          |          | this study       |
| AMB9c  | 2016 | <i>Hymenoscyphus fraxineus</i> | Ticino (TI) | 46.500727 | 8.720870 | Southern Switzerland (S-CH)       | MK079801 |          |          | this study       |
| SER13a | 2016 | <i>Hymenoscyphus fraxineus</i> | Ticino (TI) | 46.416667 | 8.983333 | Southern Switzerland (S-CH)       | -        | MK079884 |          | this study       |
| SER14a | 2016 | <i>Hymenoscyphus fraxineus</i> | Ticino (TI) | 46.416667 | 8.983333 | Southern Switzerland (S-CH)       | MK079802 |          |          | this study       |
| SER15a | 2016 | <i>Hymenoscyphus fraxineus</i> | Ticino (TI) | 46.416667 | 8.983333 | Southern Switzerland (S-CH)       | MK079803 |          |          | this study       |
| SER17b | 2016 | <i>Hymenoscyphus fraxineus</i> | Ticino (TI) | 46.416667 | 8.983333 | Southern Switzerland (S-CH)       | MK079804 |          |          | this study       |
| SER18c | 2016 | <i>Hymenoscyphus fraxineus</i> | Ticino (TI) | 46.416667 | 8.983333 | Southern Switzerland (S-CH)       | MK079805 |          |          | this study       |
| SER1a  | 2016 | <i>Hymenoscyphus fraxineus</i> | Ticino (TI) | 46.416667 | 8.983333 | Southern Switzerland (S-CH)       | MK079806 |          |          | this study       |
| SER2c  | 2016 | <i>Hymenoscyphus fraxineus</i> | Ticino (TI) | 46.416667 | 8.983333 | Southern Switzerland (S-CH)       | MK079807 |          |          | this study       |
| SER3a  | 2016 | <i>Hymenoscyphus fraxineus</i> | Ticino (TI) | 46.416667 | 8.983333 | Southern Switzerland (S-CH)       | MK079808 |          |          | this study       |
| SER4a  | 2016 | <i>Hymenoscyphus fraxineus</i> | Ticino (TI) | 46.416667 | 8.983333 | Southern Switzerland (S-CH)       | MK079809 |          |          | this study       |
| SER5a  | 2016 | <i>Hymenoscyphus fraxineus</i> | Ticino (TI) | 46.416667 | 8.983333 | Southern Switzerland (S-CH)       | MK079810 |          |          | this study       |
| SER6a  | 2016 | <i>Hymenoscyphus fraxineus</i> | Ticino (TI) | 46.416667 | 8.983333 | Southern Switzerland (S-CH)       | MK079811 |          |          | this study       |
| SER7a  | 2016 | <i>Hymenoscyphus fraxineus</i> | Ticino (TI) | 46.416667 | 8.983333 | Southern Switzerland (S-CH)       | MK079812 |          |          | this study       |
| SER8c  | 2016 | <i>Hymenoscyphus fraxineus</i> | Ticino (TI) | 46.416667 | 8.983333 | Southern Switzerland (S-CH)       | MK079813 |          |          | this study       |
| SER9b  | 2016 | <i>Hymenoscyphus fraxineus</i> | Ticino (TI) | 46.416667 | 8.983333 | Southern Switzerland (S-CH)       | MK079814 |          |          | this study       |
| VIS7a  | 2016 | <i>Hymenoscyphus fraxineus</i> | Valais (VS) | 46.292216 | 7.882776 | South-Western Switzerland (SW-CH) | MK079713 |          |          | this study       |
| 2373   | 2009 | <i>Hymenoscyphus albidus</i>   | Valais (VS) | 46.22553  | 7.37201  | South-Western Switzerland (SW-CH) | MK079831 | MK079852 | MF765342 | this study       |
| 3210   | 2010 | <i>Hymenoscyphus albidus</i>   | Ticino (TI) | 46.154458 | 8.865217 | Southern Switzerland (S-CH)       | MK079824 | -        |          | [35]; this study |
| 4301   | 2009 | <i>Hymenoscyphus albidus</i>   | Valais (VS) | 46.34     | 7.633    | South-Western Switzerland (SW-CH) | MK079832 | MK079854 | MF765397 | [35]; this study |
| 4310   | 2009 | <i>Hymenoscyphus albidus</i>   | Ticino (TI) | 46.28244  | 8.56191  | Southern Switzerland (S-CH)       | MK079819 |          | MF765346 | [35]; this study |
| 4312   | 2009 | <i>Hymenoscyphus albidus</i>   | Glarus (GL) | 47.0235   | 9.04468  | Northern Switzerland (N-CH)       | MK079816 |          | MF765347 | [35]; this study |
| 4315   | 2009 | <i>Hymenoscyphus albidus</i>   | Glarus (GL) | 47.0235   | 9.04468  | Northern Switzerland (N-CH)       | MK079817 |          | MF765348 | [35]; this study |
| 4324   | 2009 | <i>Hymenoscyphus albidus</i>   | Glarus (GL) | 47.0235   | 9.04468  | Northern Switzerland (N-CH)       | MK079818 | MK079849 | MF765350 | [35]; this study |
| 4333   | 2009 | <i>Hymenoscyphus albidus</i>   | Valais (VS) | 46.22553  | 7.633    | South-Western Switzerland (SW-CH) | MK079833 |          | MF765351 | [35]; this study |
| 4338   | 2009 | <i>Hymenoscyphus albidus</i>   | Ticino (TI) | 46.26153  | 8.50237  | Southern Switzerland (S-CH)       | -        |          | MF765353 | [35]; this study |
| 4341   | 2009 | <i>Hymenoscyphus albidus</i>   | Valais (VS) | 46.22553  | 7.633    | South-Western Switzerland (SW-CH) | MK079834 |          | MF765354 | [35]; this study |
| 4342   | 2009 | <i>Hymenoscyphus albidus</i>   | Valais (VS) | 46.22553  | 7.633    | South-Western Switzerland (SW-CH) | MK079835 |          | -        | [35]; this study |
| 4344   | 2009 | <i>Hymenoscyphus albidus</i>   | Valais (VS) | 46.22553  | 7.633    | South-Western Switzerland (SW-CH) | MK079836 |          | MF765355 | [35]; this study |
| 4346   | 2009 | <i>Hymenoscyphus albidus</i>   | Valais (VS) | 46.22553  | 7.633    | South-Western Switzerland (SW-CH) | MK079837 |          | MF765356 | [35]; this study |
| 4348   | 2009 | <i>Hymenoscyphus albidus</i>   | Valais (VS) | 46.22553  | 7.633    | South-Western Switzerland (SW-CH) | MK079838 |          | MF765357 | [35]; this study |
| 4352   | 2009 | <i>Hymenoscyphus albidus</i>   | Valais (VS) | 46.22553  | 7.633    | South-Western Switzerland (SW-CH) | MK079839 | MK079853 | -        | [35]; this study |
| 4356   | 2009 | <i>Hymenoscyphus albidus</i>   | Valais (VS) | 46.22553  | 7.633    | South-Western Switzerland (SW-CH) | MK079840 |          | MF765358 | [35]; this study |
| 4365   | 2009 | <i>Hymenoscyphus albidus</i>   | Ticino (TI) | 46.30148  | 8.42595  | Southern Switzerland (S-CH)       | MK079823 |          | MF765361 | [35]; this study |

|       |      |                                |             |           |          |                                   |          |                   |                  |
|-------|------|--------------------------------|-------------|-----------|----------|-----------------------------------|----------|-------------------|------------------|
| 4370  | 2009 | <i>Hymenoscyphus albidus</i>   | Ticino (TI) | 46.11532  | 8.34095  | Southern Switzerland (S-CH)       | -        | -                 | [35]; this study |
| 4377  | 2009 | <i>Hymenoscyphus albidus</i>   | Valais (VS) | 46.22553  | 7.633    | South-Western Switzerland (SW-CH) | MK079841 | MF765366          | this study       |
| 6003  | 2012 | <i>Hymenoscyphus albidus</i>   | Vaud (VD)   | 46.5      | 6.383333 | South-Western Switzerland (SW-CH) | -        | MF765367          | this study       |
| 6802  | 2012 | <i>Hymenoscyphus albidus</i>   | Ticino (TI) | 45.899583 | 9.046583 | Southern Switzerland (S-CH)       | MK079825 | MF765368          | [35]; this study |
| 6807  | 2012 | <i>Hymenoscyphus albidus</i>   | Ticino (TI) | 45.899583 | 9.046583 | Southern Switzerland (S-CH)       | MK079826 | MF765372          | [35]; this study |
| 6811  | 2012 | <i>Hymenoscyphus albidus</i>   | Ticino (TI) | 45.899583 | 9.046583 | Southern Switzerland (S-CH)       | MK079829 | MF765374          | [35]; this study |
| 6812  | 2012 | <i>Hymenoscyphus albidus</i>   | Ticino (TI) | 45.899583 | 9.046583 | Southern Switzerland (S-CH)       | MK079827 | MF765375          | [35]; this study |
| 6814  | 2012 | <i>Hymenoscyphus albidus</i>   | Ticino (TI) | 45.899583 | 9.046583 | Southern Switzerland (S-CH)       | MK079828 | MF765377          | [35]; this study |
| 8003  | 2009 | <i>Hymenoscyphus albidus</i>   | Ticino (TI) | 46.28244  | 8.56191  | Southern Switzerland (S-CH)       | MK079820 | -                 | [35]; this study |
| 8005  | 2009 | <i>Hymenoscyphus albidus</i>   | Ticino (TI) | 46.28244  | 8.56191  | Southern Switzerland (S-CH)       | MK079821 | MK079851 MF765380 | [35]; this study |
| 90723 | 2009 | <i>Hymenoscyphus albidus</i>   | Glarus (GL) | 47.0235   | 9.04468  | Northern Switzerland (N-CH)       | MK079815 | MK079850 MK079850 | this study       |
| 90812 | 2009 | <i>Hymenoscyphus albidus</i>   | Valais (VS) | 46.22553  | 7.37201  | South-Western Switzerland (SW-CH) | MK079830 | MF765343          | this study       |
| CAR10 | 2012 | <i>Hymenoscyphus albidus</i>   | Britany     | 47.37256  | 3.04206  | North-Western France (France)     | MK079842 | MK079847 MF765384 | [17]; this study |
| CAR16 | 2012 | <i>Hymenoscyphus albidus</i>   | Britany     | 47.37256  | 3.04206  | North-Western France (France)     | MK079843 | MF765385          | [17]; this study |
| CAR26 | 2012 | <i>Hymenoscyphus albidus</i>   | Britany     | 47.37256  | 3.04206  | North-Western France (France)     | MK079844 | MF765389          | [17]; this study |
| CAR31 | 2012 | <i>Hymenoscyphus albidus</i>   | Britany     | 47.37256  | 3.04206  | North-Western France (France)     | MK079845 | MK079848 MF765393 | [17]; this study |
| CAR32 | 2012 | <i>Hymenoscyphus albidus</i>   | Britany     | 47.37256  | 3.04206  | North-Western France (France)     | MK079846 | MF765388          | [17]; this study |
| 81010 | 2008 | <i>Hymenoscyphus fraxineus</i> | Glarus (GL) | 47.0235   | 9.04468  | Northern Switzerland (N-CH)       | -        | MF765432          | this study       |
| 4330  | 2009 | <i>Hymenoscyphus fraxineus</i> | Zurich (ZH) | 47.480381 | 8.37464  | Northern Switzerland (N-CH)       | -        | MF765433          | this study       |
| 4339  | 2009 | <i>Hymenoscyphus fraxineus</i> | Zurich (ZH) | 47.480381 | 8.37464  | Northern Switzerland (N-CH)       | -        | MF765434          | this study       |
| 4380  | 2009 | <i>Hymenoscyphus fraxineus</i> | Zurich (ZH) | 47.480381 | 8.37464  | Northern Switzerland (N-CH)       | -        | MF765435          | this study       |
| 6006  | 2012 | <i>Hymenoscyphus fraxineus</i> | Vaud (VD)   | 46.5      | 6.383333 | South-Western Switzerland (SW-CH) | -        | MF765436          | this study       |

Table A2: List of additional primers used to sequence the full open reading frame of *Hymenoscyphus fraxineus* mitovirus 1 and 5' and 3' flanking regions of HfMV1. Tm = annealing temperature in degrees Celsius.

| Name      | Sequence (5'-3')       | Tm (°C) | Location (bp) | Region |
|-----------|------------------------|---------|---------------|--------|
| Cf_1F_cc  | AAGGCCCCACTCTACTATTA   | 55      | 64-666        | 1      |
| Cf_1R_cc  | GTCCACACCTAATTTACCAAG  |         |               |        |
| Cf_1R2_cc | GGGCAAGAAKWATTTTCRTTGT | 55      | 64-646        |        |
| Cf_2F_cc  | CCGGACTCCCAAAGGTAAT    | 55      | 492-1424      | 2      |
| Cf2R_cc   | CGCTTATACTCTGTGGCCAAA  |         |               |        |
| Cf_2F2_cc | ACGCGCGGACTTAATTACG    | 55      | 380-1428      |        |
| Cf_2R2_cc | ATACGCTTTRACTCTGTGGC   |         |               |        |
| Cf_3F_cc  | GATTATGACAAAGGAACCGT   | 58      | 1244-1749     | 3      |
| Cf_3R_cc  | CATGAAATGAATGCGTAGAA   |         |               |        |
| Cf_3F2_cc | CAAGAGGGAGTGGAVAAGRT   | 53      | 1093-1670     | 3      |
| Cf_3R2_cc | GCRAGATGAGARAAGAAATGC  |         |               |        |
| Cf_4F_cc  | GTGGGTTTCCTATTGIDGGY   | 53      | 1570-2154     | 4      |
| Cf_4R_cc  | GGRCTTGGAGGTAATTTYAA   |         |               |        |
| Cf_6F2_cc | GCCGCGTTATCAAAAGAAAG   | 53      | 2058-2365     | 6      |
| Cf_6R_cc  | CATCGTCCACTGCCACTTAA   |         |               |        |

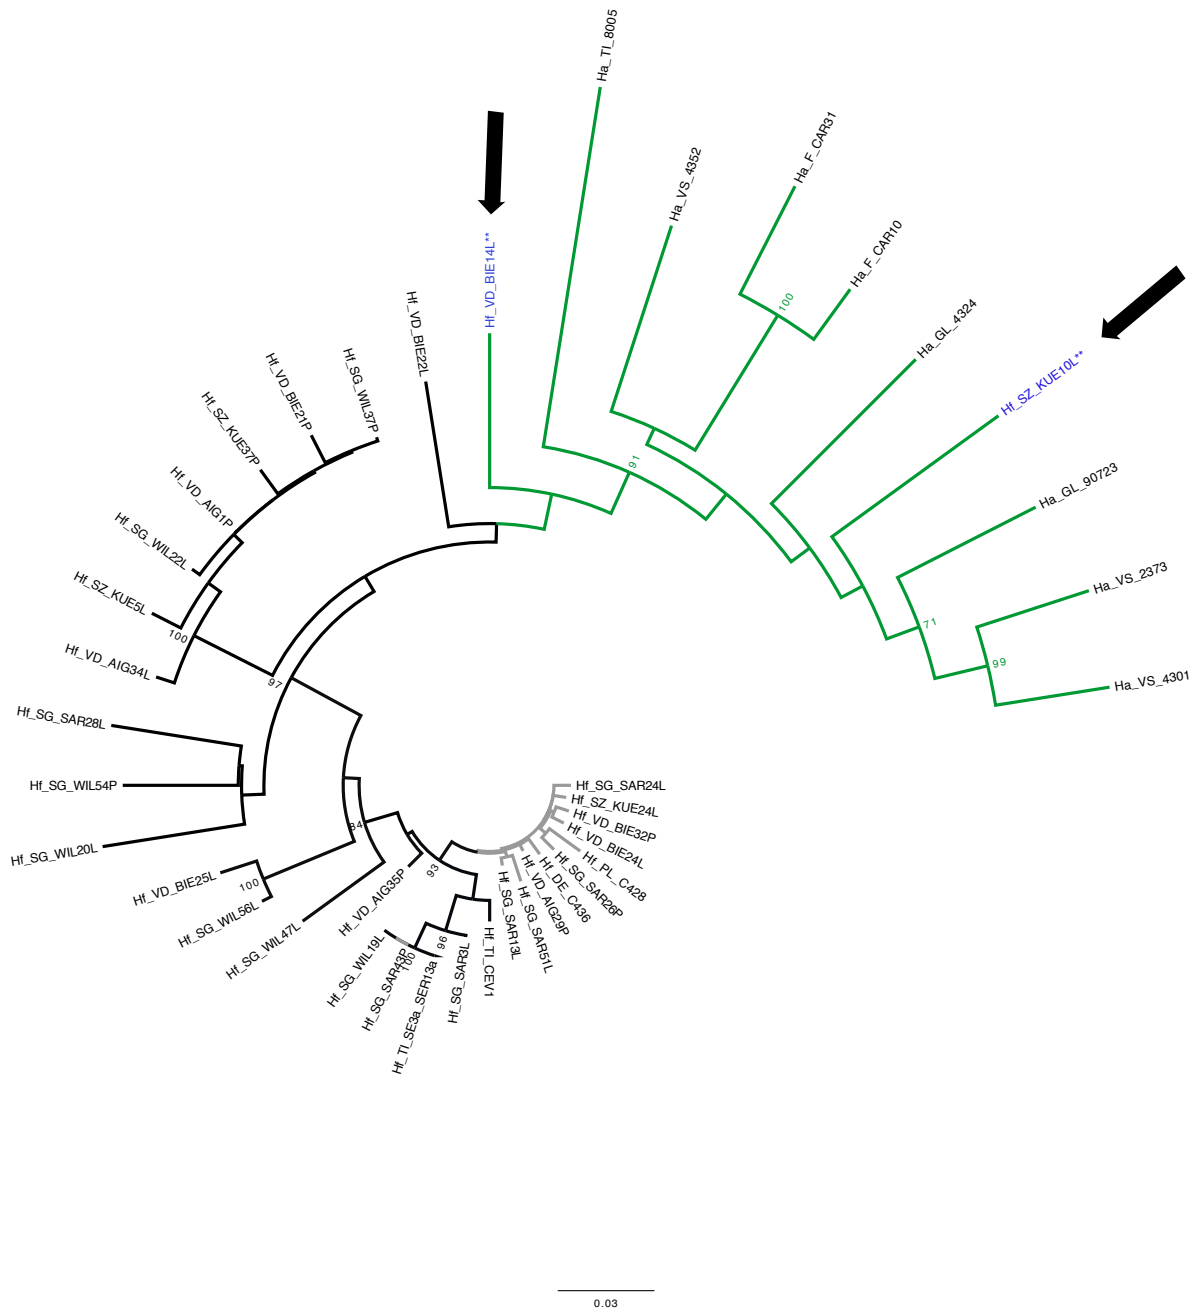

**Figure S1:** Phylogenetic tree resulting from the RaxML analysis conducted with 40 (8 *H. albidus*, 32 *H. fraxineus*) full sequences (2151 bp) of the RdRP gene of the mitovirus HfMV1. Green color depicts HfMV1 *H. albidus* group isolates. Black color depicts HfMV1 group 2 isolates and grey color HfMV1 group 1 isolates. Blue color and \*\*\* mark *H. fraxineus* isolates within the *H. albidus* group. Hf characterizes viral sequences from *H. fraxineus*, Ha from *H. albidus* isolates. For abbreviation see Table 1. Bootstrap values are shown if >70. Arrows indicate intermixing of *H. albidus* and *H. fraxineus* HfMV1 sequences.



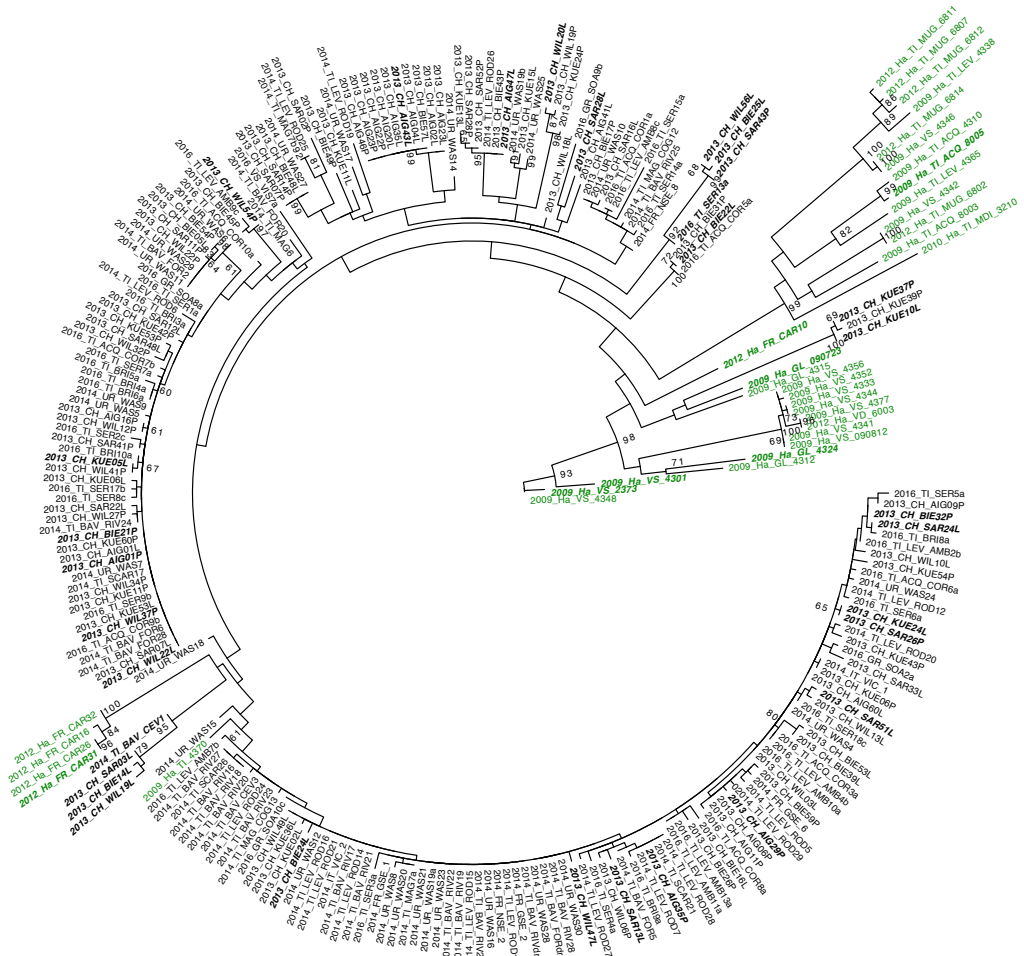

**Figure S2:** RAxML analysis conducted with 255 sequences (495 bp) of the partial RdRP gene of the mitovirus HfMV1. Green color depicts *H. albidus* isolates. Each sample is named with the sampling year, followed by the sampling locality (for abbreviation see Table 1) and sample name. Bootstrap values are show if  $\geq 60$ . Samples marked in bold and italics are included in the full-length analysis.
